# Supplementary material
Source: HighWire-hosted journal article supplement (http://www.ajnr.org/highwire/filestream/76527/field_highwire_adjunct_files/0/19-01290.pdf)
Supplement: 19-01290.pdf [file 19-01290.pdf]

**On-line Table 1: Comparison of the neuropsychological test scores between the two patient subgroups (DMD proximal and distal), and healthy controls**

| SN/Test                                    | Subset              | Group (I) | Group (J)           | Difference (I-J)   | Significance | 95% CI, Lower-to-Upper Bound |
|--------------------------------------------|---------------------|-----------|---------------------|--------------------|--------------|------------------------------|
| 1/Wechsler-Intelligence Scale for Children | Picture Completion  | Control   | Proximal            | 3.216 <sup>a</sup> | .000         | 1.45–4.98                    |
|                                            |                     |           | Distal              | 5.474 <sup>a</sup> | .000         | 3.93–7.02                    |
|                                            | Information         | Control   | Proximal            | 2.257 <sup>a</sup> | .009         | 0.45–4.06                    |
|                                            |                     |           | Distal              | 2.475 <sup>a</sup> | .002         | 0.74–4.21                    |
|                                            | Coding              | Control   | Proximal            | 5.337 <sup>a</sup> | .000         | 3.82–6.86                    |
|                                            |                     |           | Distal              | 2.862 <sup>a</sup> | .000         | 1.09–4.64                    |
|                                            | Similarities        | Control   | Proximal            | 1.343              | .468         | –0.95–3.63                   |
|                                            |                     |           | Distal              | 3.201 <sup>a</sup> | .001         | 1.20–5.21                    |
|                                            | Picture Arrangement | Control   | Proximal            | 1.859              | .169         | –0.49–4.20                   |
|                                            |                     |           | Distal              | 2.775 <sup>a</sup> | .000         | 1.23–4.32                    |
|                                            | Arithmetic          | Control   | Proximal            | 4.315 <sup>a</sup> | .000         | 2.96–5.67                    |
|                                            |                     |           | Distal              | 1.540              | .059         | –0.04–3.12                   |
|                                            | Block Design        | Control   | Proximal            | 3.043 <sup>a</sup> | .000         | 1.24–4.85                    |
|                                            |                     |           | Distal              | 4.667 <sup>a</sup> | .000         | 3.08–6.25                    |
|                                            | Vocabulary          | Control   | Proximal            | 1.623              | .105         | –0.23–3.47                   |
|                                            |                     |           | Distal              | 1.409              | .289         | –0.64–3.45                   |
|                                            | Object Assembly     | Control   | Proximal            | 4.338 <sup>a</sup> | .000         | 2.54–6.13                    |
|                                            |                     |           | Distal              | 2.929 <sup>a</sup> | .003         | 0.83–5.02                    |
|                                            | Comprehension       | Control   | Proximal            | 1.497              | .054         | –0.02–3.01                   |
|                                            |                     |           | Distal              | 3.087 <sup>a</sup> | .000         | 1.76–4.41                    |
|                                            | Digit Span          | Control   | Proximal            | 1.589 <sup>a</sup> | .043         | 0.04–3.14                    |
|                                            |                     |           | Distal              | 3.541 <sup>a</sup> | .000         | 1.70–5.38                    |
|                                            | Mazes               | Control   | Proximal            | 5.142 <sup>a</sup> | .000         | 3.53–6.75                    |
|                                            |                     |           | Distal              | 1.601              | .123         | –0.28–3.48                   |
|                                            | AVLT1               | Control   | Proximal            | 1.771 <sup>a</sup> | .012         | 0.31–3.24                    |
|                                            |                     |           | Distal              | 1.515 <sup>a</sup> | .015         | 0.23–2.80                    |
|                                            | AVLT2               | Control   | Proximal            | –0.256             | 1.000        | –1.76–1.24                   |
|                                            |                     |           | Distal              | 4.514 <sup>a</sup> | .000         | 2.55–6.48                    |
|                                            | AVLT3               | Control   | Proximal            | 6.259 <sup>a</sup> | .000         | 4.54–7.98                    |
|                                            |                     |           | Distal              | 1.745              | .112         | –0.27–3.76                   |
| AVLT4                                      | Control             | Proximal  | 1.483               | .099               | –0.19–3.15   |                              |
|                                            |                     | Distal    | 3.745 <sup>a</sup>  | .000               | 2.28–5.21    |                              |
| AVLT5                                      | Control             | Proximal  | 2.262 <sup>a</sup>  | .005               | 0.55–3.97    |                              |
|                                            |                     | Distal    | 5.566 <sup>a</sup>  | .000               | 3.39–7.74    |                              |
| AVLT_TO                                    | Control             | Proximal  | 6.082 <sup>a</sup>  | .000               | 4.18–7.99    |                              |
|                                            |                     | Distal    | 0.516               | 1.000              | –1.71–2.74   |                              |
| AVLT_IR                                    | Control             | Proximal  | 1.091               | .194               | –0.33–2.51   |                              |
|                                            |                     | Distal    | 3.245 <sup>a</sup>  | .000               | 2.00–4.49    |                              |
| AVLT_DR                                    | Control             | Proximal  | 2.153 <sup>a</sup>  | .002               | 0.70–3.61    |                              |
|                                            |                     | Distal    | 1.727 <sup>a</sup>  | .014               | 0.28–3.18    |                              |
| AVLT_DR                                    | Control             | Proximal  | 3.793 <sup>a</sup>  | .000               | 2.52–5.06    |                              |
|                                            |                     | Distal    | 2.065 <sup>a</sup>  | .003               | 0.58–3.55    |                              |
| AVLT_DR                                    | Control             | Proximal  | 1.925 <sup>a</sup>  | .014               | 0.31–3.54    |                              |
|                                            |                     | Distal    | 4.041 <sup>a</sup>  | .000               | 2.63–5.45    |                              |
| AVLT_DR                                    | Control             | Proximal  | 2.116 <sup>a</sup>  | .007               | 0.46–3.77    |                              |
|                                            |                     | Distal    | 1.683 <sup>a</sup>  | .031               | 0.11–3.25    |                              |
| AVLT_DR                                    | Control             | Proximal  | 4.183 <sup>a</sup>  | .000               | 2.81–5.56    |                              |
|                                            |                     | Distal    | 2.500 <sup>a</sup>  | .001               | 0.89–4.11    |                              |
| AVLT_DR                                    | Control             | Proximal  | 1.352               | .062               | –0.05–2.75   |                              |
|                                            |                     | Distal    | 3.522 <sup>a</sup>  | .000               | 2.29–4.75    |                              |
| AVLT_DR                                    | Control             | Proximal  | 2.170 <sup>a</sup>  | .001               | 0.73–3.61    |                              |
|                                            |                     | Distal    | 7.778 <sup>a</sup>  | .018               | 1.04–14.51   |                              |
| AVLT_DR                                    | Control             | Proximal  | 18.783 <sup>a</sup> | .000               | 12.88–24.69  |                              |
|                                            |                     | Distal    | 11.005 <sup>a</sup> | .001               | 4.10–17.91   |                              |
| AVLT_DR                                    | Control             | Proximal  | 2.475 <sup>a</sup>  | .006               | 0.57–4.38    |                              |
|                                            |                     | Distal    | 4.865 <sup>a</sup>  | .000               | 3.20–6.53    |                              |
| AVLT_DR                                    | Control             | Proximal  | 2.390 <sup>a</sup>  | .011               | 0.44–4.34    |                              |
|                                            |                     | Distal    | 2.720 <sup>a</sup>  | .001               | 1.00–4.44    |                              |
| AVLT_DR                                    | Control             | Proximal  | 4.969 <sup>a</sup>  | .000               | 3.46–6.47    |                              |
|                                            |                     | Distal    | 2.249 <sup>a</sup>  | .007               | 0.49–4.01    |                              |

*Continued on next page*

**On-line Table 1: Continued**

| SN/Test                   | Subset     | Group (I) | Group (J)               | Difference (I-J)        | Significance         | 95% CI, Lower-to-Upper Bound |
|---------------------------|------------|-----------|-------------------------|-------------------------|----------------------|------------------------------|
| 3/Memory for Designs Test | AVLT_%     | Control   | Proximal                | 13.5751682 <sup>a</sup> | .002                 | 4.082150–23.068186           |
|                           |            |           | Distal                  | 19.6638323 <sup>a</sup> | .000                 | 11.340977–27.986688          |
|                           |            | Proximal  | Distal                  | 6.0886641               | .392                 | –3.638383–15.815711          |
|                           | AVLT_REC   | Control   | Proximal                | 0.492                   | .545                 | –0.40–1.38                   |
|                           |            |           | Distal                  | 1.843 <sup>a</sup>      | .000                 | 1.06–2.62                    |
|                           | AVLT_ERR   | Proximal  | Distal                  | 1.351 <sup>a</sup>      | .001                 | 0.44–2.26                    |
|                           |            | Control   | Proximal                | –1.195                  | .340                 | –3.02–0.63                   |
|                           |            |           | Distal                  | –4.251 <sup>a</sup>     | .000                 | –5.85 to –2.65               |
|                           |            | Proximal  | Distal                  | –3.056 <sup>a</sup>     | .000                 | –4.92 to –1.19               |
|                           | MFDT1/10   | Control   | Proximal                | 0.847                   | .470                 | –0.61–2.30                   |
|                           |            |           | Distal                  | 1.838 <sup>a</sup>      | .004                 | 0.49–3.19                    |
|                           | MFDT2/10   | Proximal  | Distal                  | 0.991                   | .305                 | –0.48–2.46                   |
|                           |            | Control   | Proximal                | 1.080                   | .419                 | –0.70–2.86                   |
|                           |            |           | Distal                  | 3.169 <sup>a</sup>      | .000                 | 1.52–4.82                    |
|                           | MFDT3/10   | Proximal  | Distal                  | 2.089 <sup>a</sup>      | .017                 | 0.29–3.89                    |
|                           |            | Control   | Proximal                | 0.534                   | 1.000                | –1.14–2.21                   |
|                           |            |           | Distal                  | 3.076 <sup>a</sup>      | .000                 | 1.52–4.63                    |
|                           | MFDT4/10   | Proximal  | Distal                  | 2.542 <sup>a</sup>      | .001                 | 0.85–4.24                    |
|                           |            | Control   | Proximal                | 0.216                   | 1.000                | –1.49–1.93                   |
|                           |            |           | Distal                  | 2.496 <sup>a</sup>      | .001                 | 0.91–4.08                    |
|                           | MFDT5/10   | Proximal  | Distal                  | 2.280 <sup>a</sup>      | .006                 | 0.55–4.01                    |
|                           |            | Control   | Proximal                | 0.443                   | 1.000                | –1.00–1.89                   |
|                           |            |           | Distal                  | 2.556 <sup>a</sup>      | .000                 | 1.21–3.90                    |
|                           | MFDT_TO/50 | Proximal  | Distal                  | 2.113 <sup>a</sup>      | .002                 | 0.65–3.57                    |
|                           |            | Control   | Proximal                | 3.119                   | .886                 | –4.17–10.41                  |
|                           |            |           | Distal                  | 13.134 <sup>a</sup>     | .000                 | 6.37–19.90                   |
|                           | MFDT_DR/10 | Proximal  | Distal                  | 10.015 <sup>a</sup>     | .004                 | 2.66–17.37                   |
|                           |            | Control   | Proximal                | 1.028                   | .356                 | –0.57–2.63                   |
|                           |            |           | Distal                  | 4.115 <sup>a</sup>      | .000                 | 2.63–5.60                    |
|                           | MFDT_%/10  | Proximal  | Distal                  | 3.086 <sup>a</sup>      | .000                 | 1.47–4.70                    |
|                           |            | Control   | Proximal                | 9.8528439               | .157                 | –2.415305–22.120993          |
|                           |            |           | Distal                  | 30.5033541 <sup>a</sup> | .000                 | 19.145255–41.861453          |
| MFDT1/14                  | Proximal   | Distal    | 20.6505102 <sup>a</sup> | .000                    | 48.036712–33.264308  |                              |
|                           | Control    | Proximal  | 1.817                   | .165                    | –0.48–4.12           |                              |
|                           |            | Distal    | 1.656                   | .082                    | –0.15–3.46           |                              |
| MFDT2/14                  | Proximal   | Distal    | –0.162                  | 1.000                   | –2.53–2.20           |                              |
|                           | Control    | Proximal  | 2.611                   | .065                    | –0.12–5.34           |                              |
|                           |            | Distal    | 3.944 <sup>a</sup>      | .000                    | 1.80–6.09            |                              |
| MFDT3/14                  | Proximal   | Distal    | 1.333                   | .725                    | –1.48–4.14           |                              |
|                           | Control    | Proximal  | 3.048 <sup>a</sup>      | .005                    | 0.77–5.32            |                              |
|                           |            | Distal    | 4.200 <sup>a</sup>      | .000                    | 2.42–5.98            |                              |
| MFDT4/14                  | Proximal   | Distal    | 1.152                   | .671                    | –1.18–3.49           |                              |
|                           | Control    | Proximal  | 1.976                   | .056                    | –0.04–3.99           |                              |
|                           |            | Distal    | 4.100 <sup>a</sup>      | .000                    | 2.52–5.68            |                              |
| MFDT5/14                  | Proximal   | Distal    | 2.124 <sup>a</sup>      | .043                    | 0.05–4.19            |                              |
|                           | Control    | Proximal  | 2.198 <sup>a</sup>      | .035                    | 0.12–4.27            |                              |
|                           |            | Distal    | 3.189 <sup>a</sup>      | .000                    | 1.56–4.82            |                              |
| MFDT_TO/70                | Proximal   | Distal    | 0.990                   | .754                    | –1.14–3.12           |                              |
|                           | Control    | Proximal  | 11.651 <sup>a</sup>     | .015                    | 1.87–21.43           |                              |
|                           |            | Distal    | 17.089 <sup>a</sup>     | .000                    | 9.41–24.77           |                              |
| MFDT_DR/14                | Proximal   | Distal    | 5.438                   | .549                    | –4.61–15.49          |                              |
|                           | Control    | Proximal  | 2.024                   | .224                    | –0.74–4.79           |                              |
|                           |            | Distal    | 4.701 <sup>a</sup>      | .000                    | 2.53–6.87            |                              |
| MFDT_%/14                 | Proximal   | Distal    | 2.676                   | .071                    | –0.17–5.52           |                              |
|                           | Control    | Proximal  | –1.9302787              | 1.000                   | –20.703920–16.843363 |                              |
|                           |            | Distal    | 18.9113109 <sup>a</sup> | .008                    | 4.176693–33.645929   |                              |
|                           | Proximal   | Distal    | 20.8415896 <sup>a</sup> | .030                    | 1.549447–40.133733   |                              |

**Note:**—“MFDT10 Total- TO” or “MFDT14 Total- TO” indicates the total number of pictures learnt after 5 trial; MFDT, Memory for Designs Test; TO, cumulative sum of the scores in all 5 trials; DR, delayed recall; AVLT, Auditory Verbal Learning Test; REC, Recall- Total number of correct hits is calculated under “Recall”; ERR, ERROR - Total number of commissions and omissions; IR, immediate recall; SN, serial number; MFDT10, children from 6-8 years of age where 10 pictures are presented for testing and 5 trials given similar to AVLT; MFDT14, 8-10 years old children where 14 pictures are presented.

<sup>a</sup> Level of significance.

**On-line Table 2: Quantitative values of DTI derived metrics (FA and MD) from different regions of the brain and comparison of FA and MD between healthy controls and DMD subgroup patients (DMD proximal and distal mutation)**

| SN                           | Brain Regions                                             | Control   | Proximal Dp140+            | Distal Dp140- | ANOVA (p-value)    | Paired t-test (p-value) |                     |      |
|------------------------------|-----------------------------------------------------------|-----------|----------------------------|---------------|--------------------|-------------------------|---------------------|------|
|                              |                                                           |           |                            |               |                    | Proximal vs. control    | Distal vs. control  |      |
|                              |                                                           |           | Fractional Anisotropy (FA) |               |                    |                         | Proximal vs. distal |      |
| 1                            | Anterior thalamic radiation-L (ATR)                       | 0.45±0.01 | 0.44±0.01                  | 0.44±0.02     | 0.001 <sup>a</sup> | 0.001 <sup>a</sup>      | 0.01                | 1.00 |
| 2                            | Anterior thalamic radiation-R (ATR)                       | 0.45±0.02 | 0.44±0.01                  | 0.44±0.01     | 0.01 <sup>a</sup>  | 0.01 <sup>a</sup>       | 0.22                | 0.36 |
| 3                            | Corticospinal tract-L (CST)                               | 0.54±0.01 | 0.53±0.01                  | 0.53±0.02     | 0.02               | 0.02                    | 0.47                | 0.42 |
| 4                            | Corticospinal tract-R (CST)                               | 0.54±0.01 | 0.53±0.01                  | 0.53±0.02     | 0.03               | 0.05                    | 0.16                | 1.00 |
| 5                            | Cingulum (cingulate gyrus)-L (Cg)                         | 0.42±0.02 | 0.40±0.01                  | 0.41±0.02     | 0.001 <sup>a</sup> | 0.001 <sup>a</sup>      | 0.01                | 0.90 |
| 6                            | Cingulum (cingulate gyrus)-R (Cg)                         | 0.39±0.02 | 0.38±0.01                  | 0.39±0.02     | 0.07               | 0.07                    | 0.52                | 0.86 |
| 7                            | Inferior fronto-occipital fasciculus-L (ILOF)             | 0.44±0.02 | 0.43±0.01                  | 0.44±0.02     | 0.08               | 0.10                    | 0.34                | 1.00 |
| 8                            | Inferior fronto-occipital fasciculus-R (ILOF)             | 0.44±0.02 | 0.43±0.02                  | 0.43±0.02     | 0.12               | 0.14                    | 0.54                | 1.00 |
| 9                            | Inferior longitudinal fasciculus-L (ILF)                  | 0.39±0.02 | 0.38±0.02                  | 0.39±0.02     | 0.09               | 0.12                    | 0.40                | 1.00 |
| 10                           | Inferior longitudinal fasciculus-R (ILF)                  | 0.39±0.02 | 0.36±0.02                  | 0.37±0.02     | 0.03               | 0.04                    | 0.29                | 0.94 |
| 11                           | Superior longitudinal fasciculus-L (SLF)                  | 0.42±0.02 | 0.04±0.02                  | 0.40±0.02     | 0.001 <sup>a</sup> | 0.001 <sup>a</sup>      | 0.001               | 1.00 |
| 12                           | Superior longitudinal fasciculus-R (SLF)                  | 0.41±0.02 | 0.40±0.01                  | 0.40±0.02     | 0.02               | 0.02                    | 0.12                | 1.00 |
| 13                           | Uncinate fasciculus-L (Unc)                               | 0.39±0.02 | 0.37±0.02                  | 0.38±0.02     | 0.07               | 0.07                    | 0.68                | 0.69 |
| 14                           | Uncinate fasciculus-R (Unc)                               | 0.39±0.02 | 0.39±0.02                  | 0.38±0.04     | 0.05               | 0.04                    | 1.00                | 0.29 |
| 15                           | Superior longitudinal fasciculus (temporal part)-L (SLFt) | 0.40±0.02 | 0.38±0.02                  | 0.39±0.02     | 0.02               | 0.02                    | 0.25                | 0.80 |
| 16                           | Superior longitudinal fasciculus (temporal part)-R (SLFt) | 0.47±0.02 | 0.43±0.02                  | 0.44±0.02     | 0.04               | 0.08                    | 0.10                | 1.00 |
| 17                           | Body of corpus callosum (bCC)                             | 0.60±0.03 | 0.68±0.03                  | 0.68±0.04     | 0.01               | 0.01                    | 0.01                | 1.00 |
| <b>Mean Diffusivity (MD)</b> |                                                           |           |                            |               |                    |                         |                     |      |
| 1                            | Anterior thalamic radiation-L (ATR)                       | 0.82±0.03 | 0.83±0.03                  | 0.84±0.03     | 0.001 <sup>a</sup> | 0.08                    | 0.001 <sup>a</sup>  | 1.00 |
| 2                            | Anterior thalamic radiation-R (ATR)                       | 0.83±0.04 | 0.84±0.04                  | 0.84±0.02     | 0.23               | 0.72                    | 0.32                | 1.00 |
| 3                            | Corticospinal tract-L (CST)                               | 0.76±0.03 | 0.76±0.02                  | 0.77±0.02     | 0.01 <sup>a</sup>  | 0.95                    | 0.001 <sup>a</sup>  | 1.00 |
| 4                            | Corticospinal tract-R (CST)                               | 0.76±0.03 | 0.77±0.02                  | 0.78±0.02     | 0.01 <sup>a</sup>  | 0.79                    | 0.01 <sup>a</sup>   | 1.00 |
| 5                            | Cingulum (cingulate gyrus)-L (Cg)                         | 0.78±0.04 | 0.80±0.03                  | 0.81±0.02     | 0.001 <sup>a</sup> | 0.06                    | 0.001 <sup>a</sup>  | 1.00 |
| 6                            | Cingulum (cingulate gyrus)-R (Cg)                         | 0.80±0.04 | 0.81±0.02                  | 0.82±0.01     | 0.01               | 0.62                    | 0.01                | 1.00 |
| 7                            | Forceps major (FMa)                                       | 0.77±0.04 | 0.79±0.03                  | 0.82±0.02     | 0.001              | 0.06                    | 0.001 <sup>a</sup>  | 1.00 |
| 8                            | Forceps minor (FMi)                                       | 0.80±0.04 | 0.82±0.03                  | 0.82±0.02     | 0.07               | 0.18                    | 0.14                | 1.00 |
| 9                            | Inferior fronto-occipital fasciculus-L (ILOF)             | 0.80±0.04 | 0.81±0.02                  | 0.82±0.02     | 0.08               | 0.10                    | 0.08                | 1.00 |
| 10                           | Inferior fronto-occipital fasciculus-R (ILOF)             | 0.80±0.04 | 0.81±0.02                  | 0.82±0.02     | 0.07               | 1.00                    | 0.06                | 1.00 |
| 11                           | Inferior longitudinal fasciculus-L (ILF)                  | 0.81±0.04 | 0.83±0.03                  | 0.84±0.02     | 0.01 <sup>a</sup>  | 0.13                    | 0.001 <sup>a</sup>  | 1.00 |
| 12                           | Inferior longitudinal fasciculus-R (ILF)                  | 0.82±0.03 | 0.80±0.02                  | 0.84±0.02     | 0.03               | 0.81                    | 0.02                | 1.00 |
| 13                           | Superior longitudinal fasciculus-L (SLF)                  | 0.78±0.04 | 0.80±0.02                  | 0.81±0.02     | 0.001 <sup>a</sup> | 0.04                    | 0.001 <sup>a</sup>  | 1.00 |
| 14                           | Superior longitudinal fasciculus-R (SLF)                  | 0.78±0.03 | 0.79±0.03                  | 0.81±0.03     | 0.001 <sup>a</sup> | 0.05                    | 0.001 <sup>a</sup>  | 1.00 |
| 15                           | Uncinate fasciculus-L (Unc)                               | 0.89±0.05 | 0.90±0.03                  | 0.90±0.03     | 0.17               | 1.00                    | 0.18                | 1.00 |
| 16                           | Uncinate fasciculus-R (Unc)                               | 0.97±0.06 | 0.97±0.04                  | 0.95±0.03     | 0.20               | 1.00                    | 0.24                | 0.23 |
| 17                           | Superior longitudinal fasciculus (temporal part)-L (SLFt) | 0.79±0.04 | 0.81±0.02                  | 0.82±0.02     | 0.001 <sup>a</sup> | 0.15                    | 0.001 <sup>a</sup>  | 1.00 |
| 18                           | Superior longitudinal fasciculus (temporal part)-R (SLFt) | 0.80±0.03 | 0.82±0.02                  | 0.82±0.02     | 0.001 <sup>a</sup> | 0.07                    | 0.001 <sup>a</sup>  | 1.00 |
| 19                           | Body of corpus callosum (bCC)                             | 0.81±0.04 | 0.83±0.04                  | 0.85±0.04     | 0.001 <sup>a</sup> | 0.37                    | 0.01 <sup>a</sup>   | 0.63 |

**Note:**—L indicates left; R, right; SN, serial number.  
<sup>a</sup> statistically significant values.
